# Supplementary material
Source: PubMed Central journal article supplement (PMC2889342)
Supplement: 0906172107_pnas.200906172SI.pdf [file 0906172107_pnas.200906172SI.pdf]

# Supporting Information

Palmer and Schloss 10.1073/pnas.0906172107

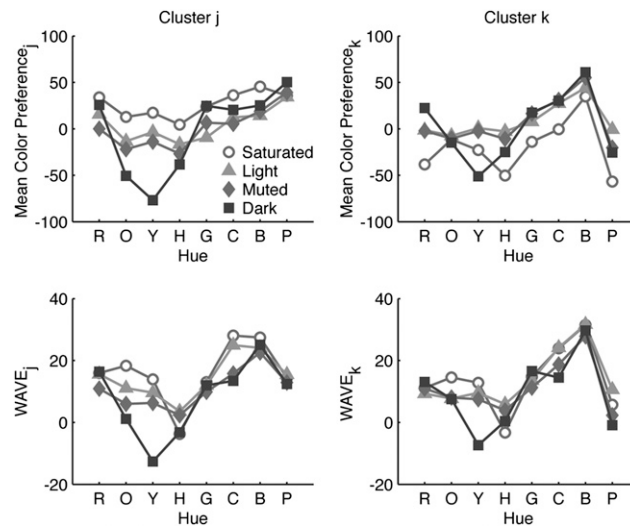

**Fig. S1.** Group average color preference ratings (*Upper*) and group weighted affective valence estimates (*Lower*) computed for group j (*Left*) and for group k (*Right*), as defined by the two highest level groups in a hierarchical clustering analysis (1).

1. Carroll JD (1976) Spatial, non-spatial and hybrid models for scaling. *Psychometrika* 41:439–463.

## Other Supporting Information Files

[Table S1 \(DOC\)](#)

[Table S2 \(DOC\)](#)
